# Supplementary material
Source: MDPI journal article supplement (https://www.mdpi.com/2073-8994/14/9/1800)
Supplement: s1 [file s1]

*Supplementary Materials to the article:*

## **Digitalizing Structure–Symmetry Relations at the Formation of Endofullerenes in Terms of Information-Entropy Formalism**

Denis Sh. Sabirov <sup>1,\*</sup>, Alina A. Tukhbatullina <sup>1</sup> and Igor S. Shepelevich <sup>1</sup>

<sup>1</sup> Institute of Petrochemistry and Catalysis UFRC RAS, 450075  
Ufa, Russia

\* Correspondence: [diozno@mail.ru](mailto:diozno@mail.ru); Tel.: +7 347 284 27 50

**Numerical data on the formation of endofullerenes  $X@C_{84}$   
associated with Figure 8.**

| <b>Isomer</b>                    | <b>Partition</b> | <b><math>\sigma</math></b> | <b><math>\chi</math></b> | <b><math>h_{C_N}</math></b> | <b><math>h_{X@C_N}</math></b> | <b><math>H_{reorg}^{str}</math></b> |
|----------------------------------|------------------|----------------------------|--------------------------|-----------------------------|-------------------------------|-------------------------------------|
| C <sub>84</sub> -1 ( $D_2$ )     | 21×4             | 4                          | 168                      | 4.392                       | 4.433                         | 0.041                               |
| C <sub>84</sub> -2 ( $C_2$ )     | 42×2             | 2                          | 84                       | 5.392                       | 5.421                         | 0.029                               |
| C <sub>84</sub> -3 ( $C_s$ )     | 4×1 + 40×2       | 1                          | 80                       | 5.440                       | 5.468                         | 0.028                               |
| C <sub>84</sub> -4 ( $D_{2d}$ )  | 3×4 + 9×8        | 4                          | 240                      | 3.535                       | 3.586                         | 0.051                               |
| C <sub>84</sub> -5 ( $D_2$ )     | 21×4             | 4                          | 168                      | 4.392                       | 4.433                         | 0.041                               |
| C <sub>84</sub> -6 ( $C_{2v}$ )  | 4×2 + 19×4       | 2                          | 160                      | 4.488                       | 4.527                         | 0.039                               |
| C <sub>84</sub> -7 ( $C_{2v}$ )  | 4×2 + 19×4       | 2                          | 160                      | 4.488                       | 4.527                         | 0.039                               |
| C <sub>84</sub> -8 ( $C_2$ )     | 42×2             | 2                          | 84                       | 5.392                       | 5.421                         | 0.029                               |
| C <sub>84</sub> -9 ( $C_2$ )     | 42×2             | 2                          | 84                       | 5.392                       | 5.421                         | 0.029                               |
| C <sub>84</sub> -10 ( $C_s$ )    | 8×1 + 38×2       | 1                          | 76                       | 5.488                       | 5.515                         | 0.028                               |
| C <sub>84</sub> -11 ( $C_2$ )    | 42×2             | 2                          | 84                       | 5.392                       | 5.421                         | 0.029                               |
| C <sub>84</sub> -12 ( $C_1$ )    | 84×1             | 1                          | 0                        | 6.392                       | 6.409                         | 0.017                               |
| C <sub>84</sub> -13 ( $C_2$ )    | 42×2             | 2                          | 84                       | 5.392                       | 5.421                         | 0.029                               |
| C <sub>84</sub> -14 ( $C_s$ )    | 2×1 + 41×2       | 1                          | 82                       | 5.416                       | 5.445                         | 0.029                               |
| C <sub>84</sub> -15 ( $C_s$ )    | 4×1 + 40×2       | 1                          | 80                       | 5.440                       | 5.468                         | 0.028                               |
| C <sub>84</sub> -16 ( $C_s$ )    | 2×1 + 41×2       | 1                          | 82                       | 5.416                       | 5.445                         | 0.029                               |
| C <sub>84</sub> -17 ( $C_{2v}$ ) | 6×2 + 18×4       | 2                          | 156                      | 4.535                       | 4.574                         | 0.039                               |
| C <sub>84</sub> -18 ( $C_{2v}$ ) | 2×2 + 20×4       | 2                          | 164                      | 4.440                       | 4.480                         | 0.040                               |
| C <sub>84</sub> -19 ( $D_{3d}$ ) | 2×6 + 6×12       | 6                          | 289                      | 2.950                       | 3.008                         | 0.058                               |
| C <sub>84</sub> -20 ( $T_d$ )    | 1×12 + 3×24      | 12                         | 373                      | 1.950                       | 2.020                         | 0.069                               |
| C <sub>84</sub> -21 ( $D_2$ )    | 21×4             | 4                          | 168                      | 4.392                       | 4.433                         | 0.041                               |
| C <sub>84</sub> -22 ( $D_2$ )    | 21×4             | 4                          | 168                      | 4.392                       | 4.433                         | 0.041                               |
| C <sub>84</sub> -23 ( $D_{2d}$ ) | 1×4 + 10×8       | 4                          | 248                      | 3.440                       | 3.492                         | 0.052                               |
| C <sub>84</sub> -24 ( $D_{6h}$ ) | 3×12 + 2×24      | 12                         | 349                      | 2.236                       | 2.302                         | 0.066                               |
